# Supplementary material for: Exceptionally high thermal and electrical conductivity of three-dimensional graphene-foam-based polymer composites
Source: Royal Society of Chemistry journal article supplement (doi:10.1039/c5ra27223h), 2016-01-01
Supplement: c5ra27223h1.pdf [file c5ra27223h1.pdf]

## SUPPORTING INFORMATION

### **Exceptionally high thermal and electrical conductivity of three dimensional graphene foam based polymer composites**

Zhiduo Liu<sup>#1,2</sup>, Dianyu Shen<sup>#2</sup>, Jinhong Yu<sup>\*2</sup>, Wen Dai<sup>2</sup>, Chaoyang Li<sup>4</sup>, Shiyu Du<sup>3</sup>, Nan Jiang<sup>2</sup>, Hairong Li<sup>\*1</sup>, Cheng-Te Lin<sup>\*2</sup>

*<sup>1</sup>Institute of Microelectronics, School of Physical Science and Technology, Lanzhou University, Key Laboratory for Magnetism and Magnetic Materials of The Ministry of Education; Key Laboratory of Special Function Materials and Structure Design, Ministry of Education, Lanzhou, Gansu 730000, China.*

*<sup>2</sup>Key Laboratory of Marine Materials and Related Technologies, Zhejiang Key Laboratory of Marine Materials and Protective Technologies, Ningbo Institute of Materials Technology and Engineering, Chinese Academy of Sciences, Ningbo 315201, China.*

*<sup>3</sup>Division of Functional Materials and Nanodevices, Ningbo Institute of Materials Technology and Engineering, Chinese Academy of Sciences, Ningbo, Zhejiang, 315201, China.*

*<sup>4</sup>Research Institute & School of Systems Engineering, Kochi University of Technology, Kami City, Kochi 782-8502, Japan.*

*\*Corresponding author,*

*E-mail: yujinhong@nimte.ac.cn; hrli@lzu.edu.cn; linzhengde@nimte.ac.cn*

*# These authors contributed equally to this study.*

## SUPPLEMENT

The binding energy profile measured by X-ray photoemission spectroscopy, which was used to further explore the chemical compositions of GNPs, as demonstrated in **Figure S1**. This figure shows  $C_{1s}$  binding energies at 285.2 eV (C-OH), 286.6 eV (C=O), and 289 eV (O=C-OH), respectively, suggesting that some oxygen-containing functional groups are present, where the atomic percentages of various carbon bonds derived from the fitted peak areas are indicated in **Figure S1**.

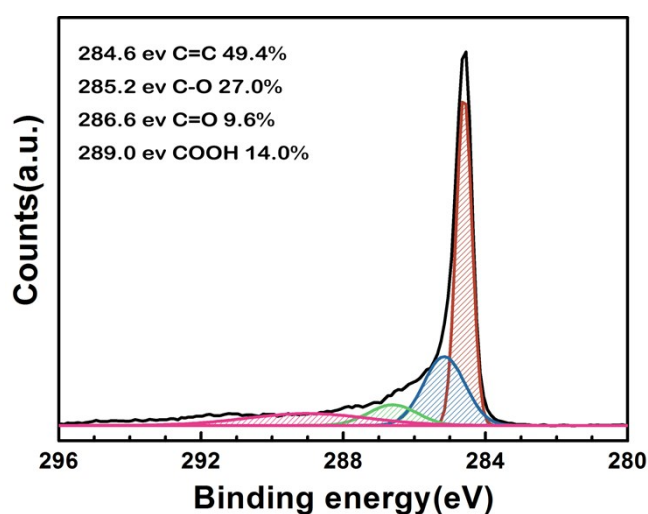

**Figure S1.** XPS spectra of GNP.

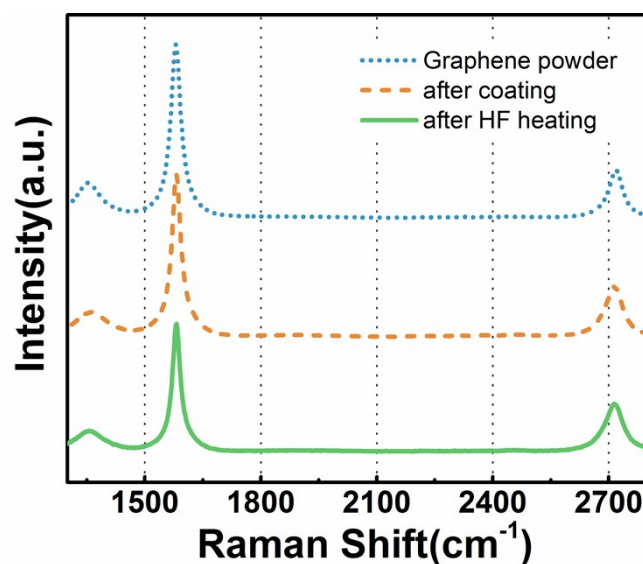

**Figure S2.** Raman spectra of GNP.

Raman spectra were often assigned to be an effective method to characterize carbon-related materials. As can be seen in **Figure S2**, the prominent G peak at 1579  $cm^{-1}$  corresponds to the high-frequency  $E_{2g}$  phonon at  $\Gamma$ . In addition, the D-band (1345  $cm^{-1}$ ) intensity is related to the defect,  $sp^3$ -

hybridized carbon which can be activated at the edges. The  $I_D/I_G$  ratio reflects the degree of the defects in the GNPs structure. The Low  $I_D/I_G$  ratio means high crystalline quality of graphene, which has good thermal conduction property. The decline of  $I_D$  from the graphene powder to the GF after PU decomposition indicates that the defects have been recovered to some extent. The 2D band ( $2708\text{ cm}^{-1}$ ) has been known to be very sensitive to the graphene layer number. From the position and the shape of 2D peak, we can draw a conclusion that graphene flake are constituted by few-layer graphene.

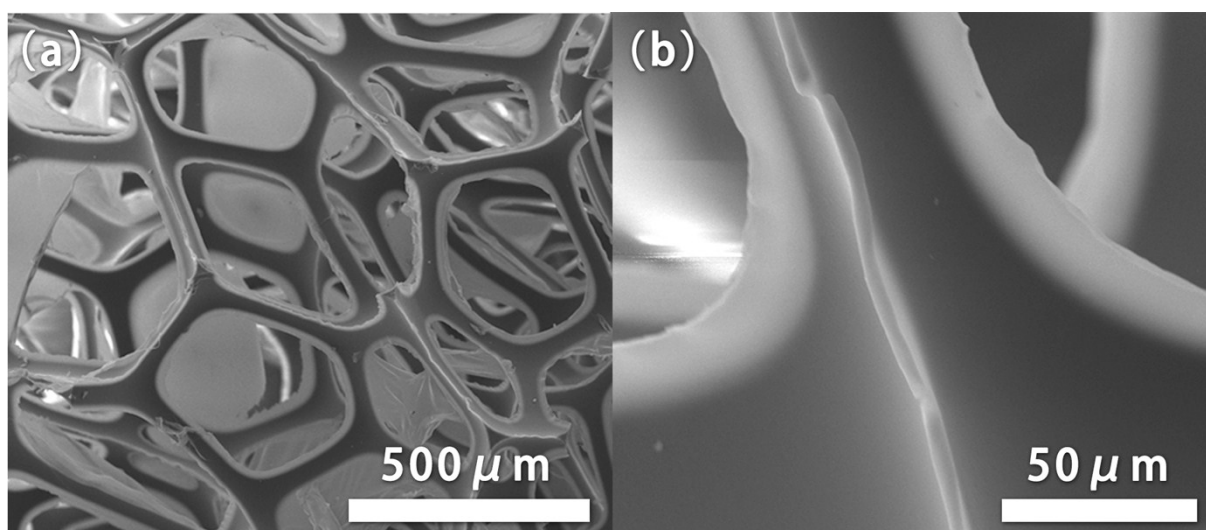

**Figure S3.** (a) Low- and (b) high-magnification SEM images of neat PU foam.

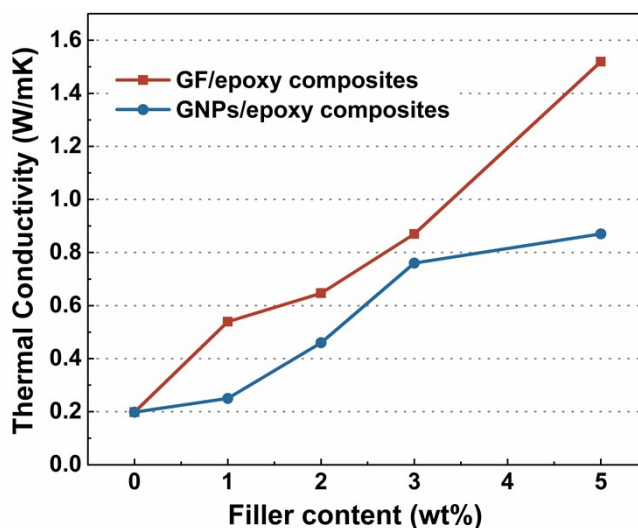

**Figure S4.** Thermal conductivity of the epoxy composites.
